# Supplementary material for: Exploring complex cellular phenotypes and model-guided strain design with a novel genome-scale metabolic model of Clostridium thermocellum DSM 1313 implementing an adjustable cellulosome
Source: PubMed Central journal article supplement (PMC5012057; doi:10.1186/s13068-016-0607-x), 2016-09-06

**A Novel Genome Scale Metabolic Model of *Clostridium thermocellum* DSM  
1313 Implementing an Adjustable Cellulosome for Examining Complex  
Cellular Phenotypes and Model-Guided Strain Design**

**Supplementary File S2**

R. Adam Thompson<sup>1,2</sup>, Sanjeev Dahal<sup>2,3</sup>, Sergio Garcia<sup>2,4</sup>, Intawat Nookaew<sup>2,3</sup>, and Cong T. Trinh<sup>1,2,4\*</sup>

<sup>1</sup>Bredesen Center for Interdisciplinary Research and Graduate Education, University of Tennessee, Knoxville, TN 37996, USA and Oak Ridge National Laboratory, Oak Ridge, TN 37831, USA

<sup>2</sup> BioEnergy Science Center, Oak Ridge National Laboratory, Oak Ridge, TN 37831, USA

<sup>3</sup>Comparative Genomics Group, Biosciences Division, Oak Ridge National Laboratory, Oak Ridge, TN, 37831

<sup>4</sup>Department of Chemical and Biomolecular Engineering, University of Tennessee, Knoxville, TN 37996, USA.

\*Corresponding author: [ctrinh@utk.edu](mailto:ctrinh@utk.edu)

**Supplementary Table S1.** Comparison of *iAT601* predictions of mutant strain growth using the calculated GAM parameter. Fermentation product fluxes were constrained using experimental values presented in Thompson et al, *Met. Eng.*, 2015, **32**:207-219. Gene deletions were implemented by constraining appropriate reaction bounds to zero.

| <b>Strain</b>                | <b>Specific growth rate <math>\mu</math> (hr<sup>-1</sup>)</b> |                   |
|------------------------------|----------------------------------------------------------------|-------------------|
|                              | <b>Experiment</b>                                              | <b>Simulation</b> |
| Parent                       | 0.33                                                           | 0.33              |
| $\Delta hydG$                | 0.24                                                           | 0.26              |
| $\Delta hydG \Delta ech$     | 0.22                                                           | 0.25              |
| $\Delta hydG \Delta pta-ack$ | 0.16                                                           | 0.18              |



**Supplementary Figure S2.** Fractional reaction appearance in ethanol constrained Minimal Cut Set strategies for reactions with a fraction above 1%. Fractional appearance calculated by summing the times a reaction is present in an MCS divided by the total cMCS count.

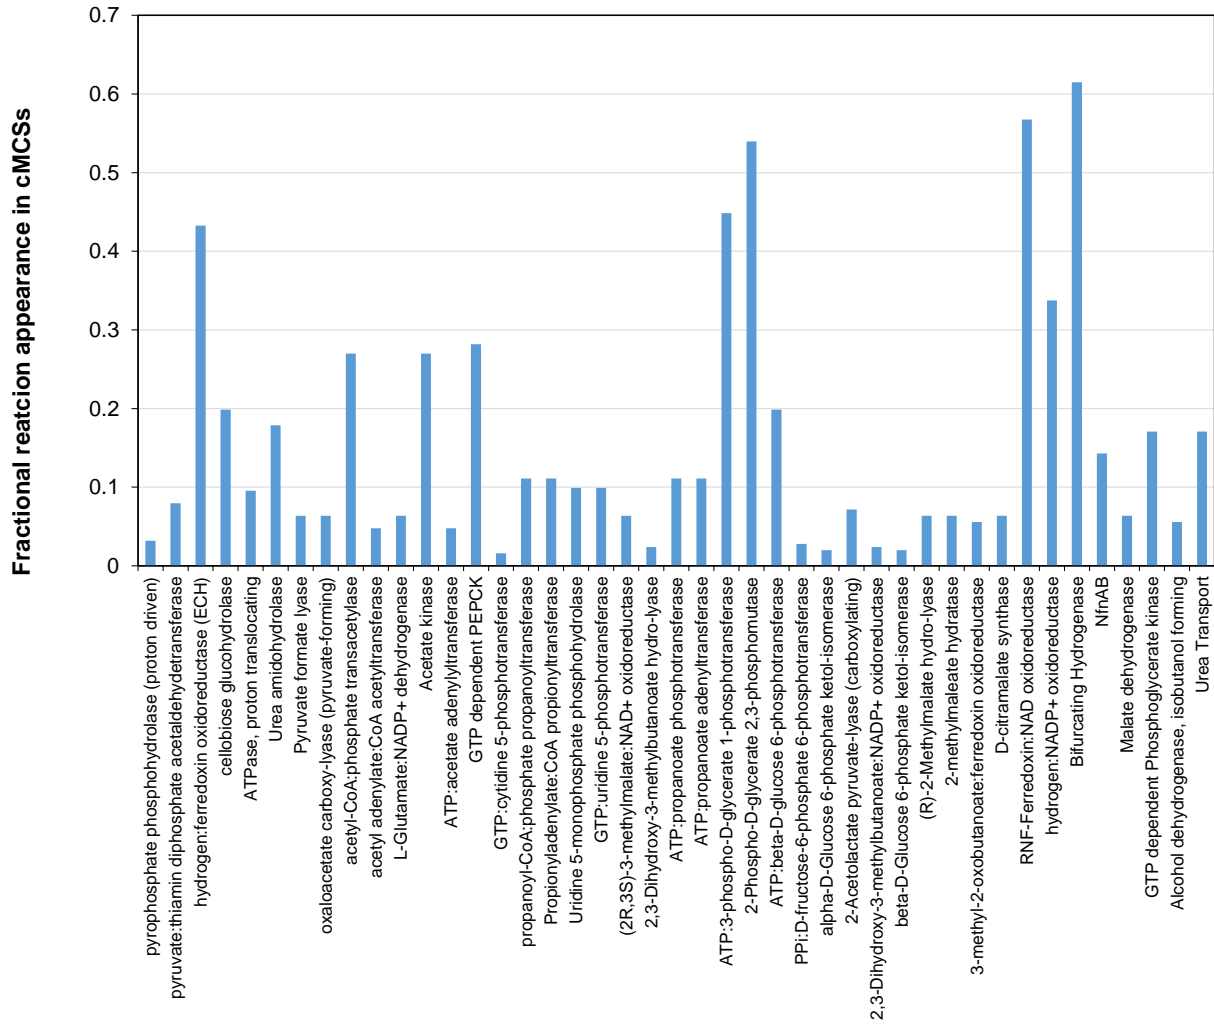

**Supplementary Figure S3.** Predicted averaged fluxes of major fermentation products for growth of *C. thermocellum* on cellobiose (A-C) and cellulose (D-F). These fluxes were presented for low growth phase (A, D), moderate growth phase (B, E), and high growth phase (C, F).

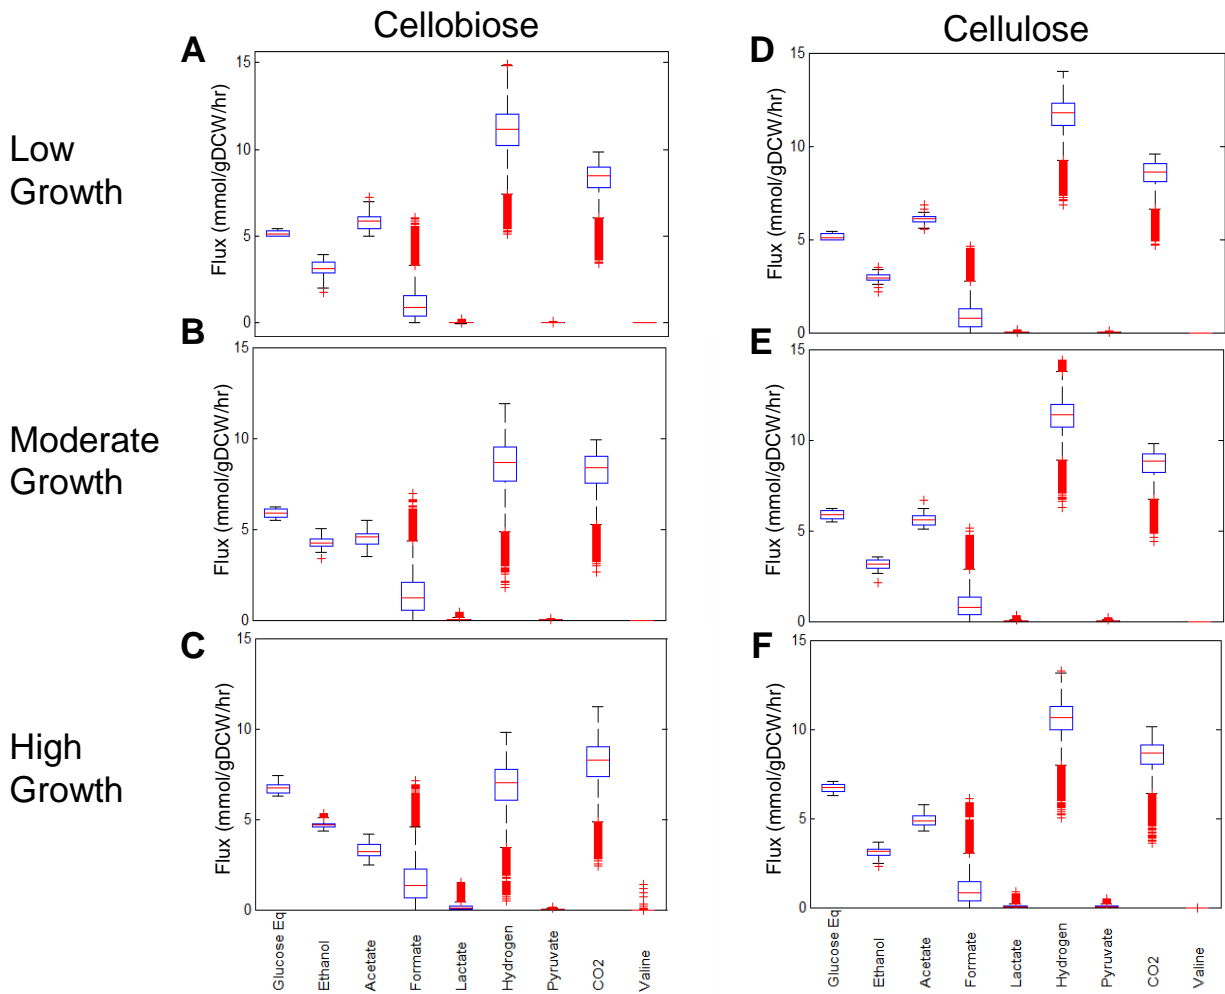

Supplement: 13068_2016_607_MOESM2_ESM.pdf [file 13068_2016_607_MOESM2_ESM.pdf]
